# Supplementary material for: Insights into the Composition and Antibacterial Activity of Amomum tsao-ko Essential Oils from Different Regions Based on GC-MS and GC-IMS
Source: MDPI journal article supplement (doi:10.3390/foods11101402), 2022-05-12
Supplement: s1 [file s1]

# Core/Shell Pigments with Polyaniline Shell: Optical and Physical–Technical Properties

Tatyana A. Pugacheva <sup>1</sup>, Georgiy V. Malkov <sup>1</sup>, Alexander A. Ilyin <sup>2</sup>, Eugene A. Indeikin <sup>2</sup> and Vladimir G. Kurbatov <sup>1,2,\*</sup>

<sup>1</sup> Institute for Problems of Chemical Physics of the Russian Academy of Sciences (IPCP RAS), Academician Semenov Avenue 1, 142432 Chernogolovka, Russia; sinichka.71@yandex.ru (T.A.P.); gmalkov@mail.ru (G.V.M.)

<sup>2</sup> , Department of Chemical Technology of Organic Coatings, Yaroslavl State Technical University, Moscow Avenue 88, 150023 Yaroslavl, Russia; 471562@mail.ru (A.A.I.); eugene.indeikin@ya.ru (E.A.I.)

\* Correspondence: kurbatovvg@list.ru; Tel.: +7-(49652)-2-77-10

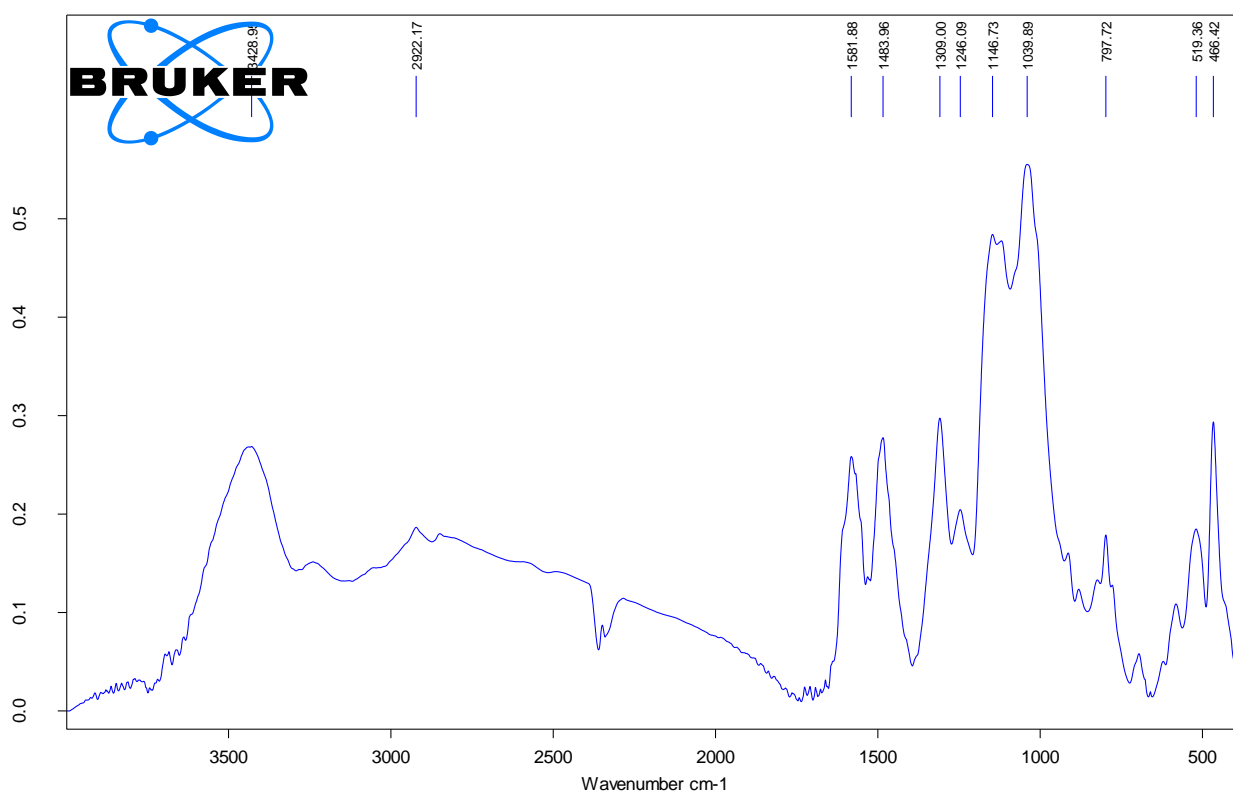

(a)

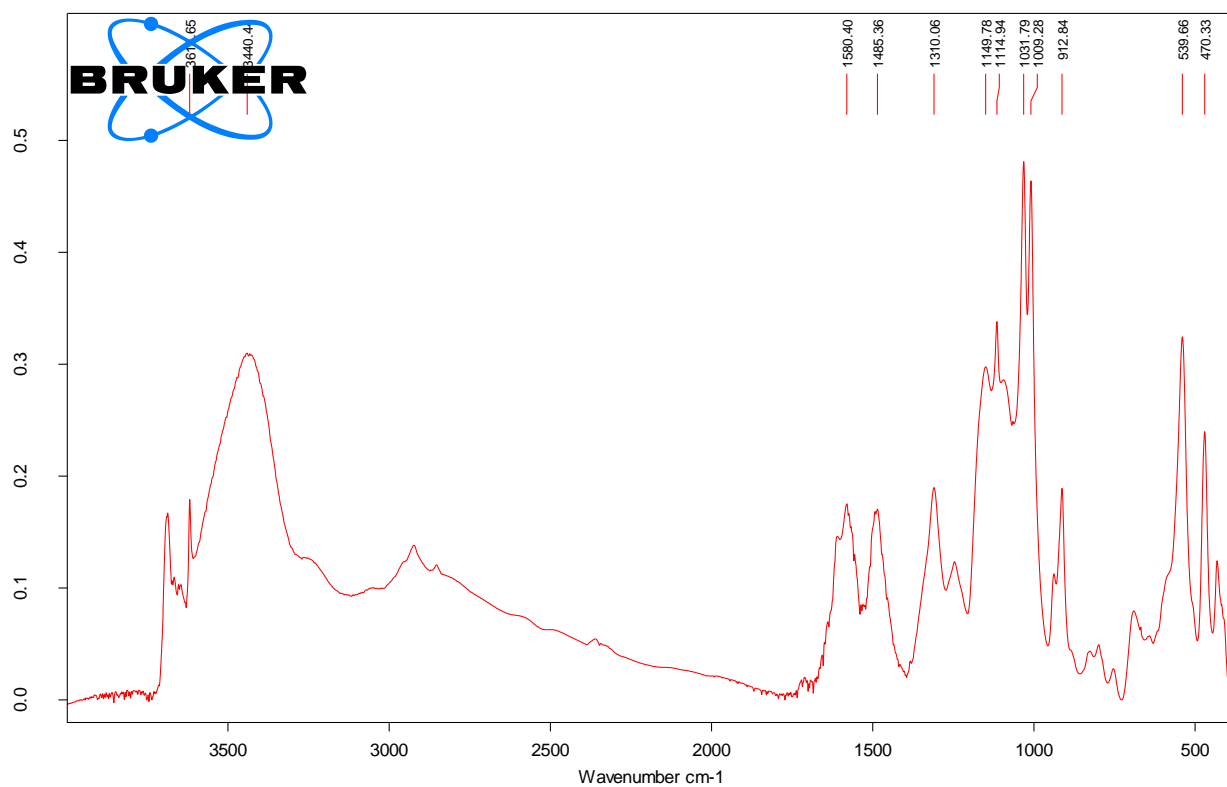

(b)

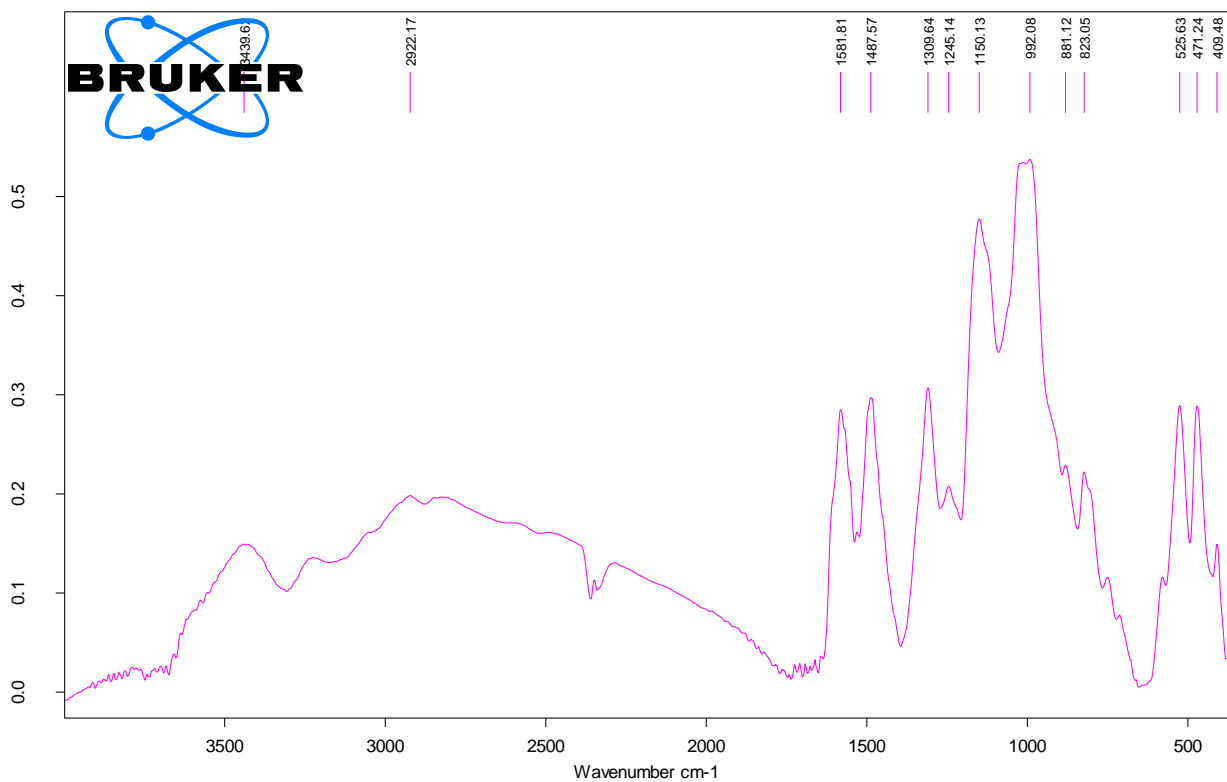

(c)

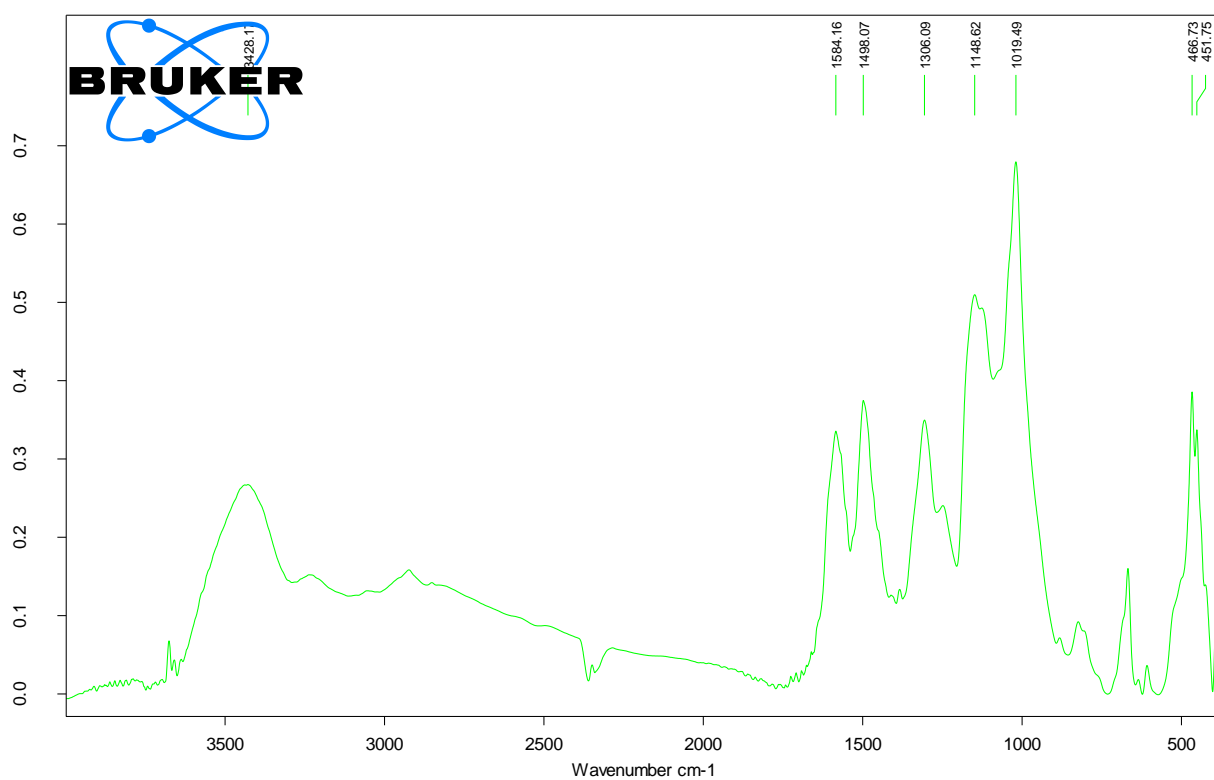

(d)

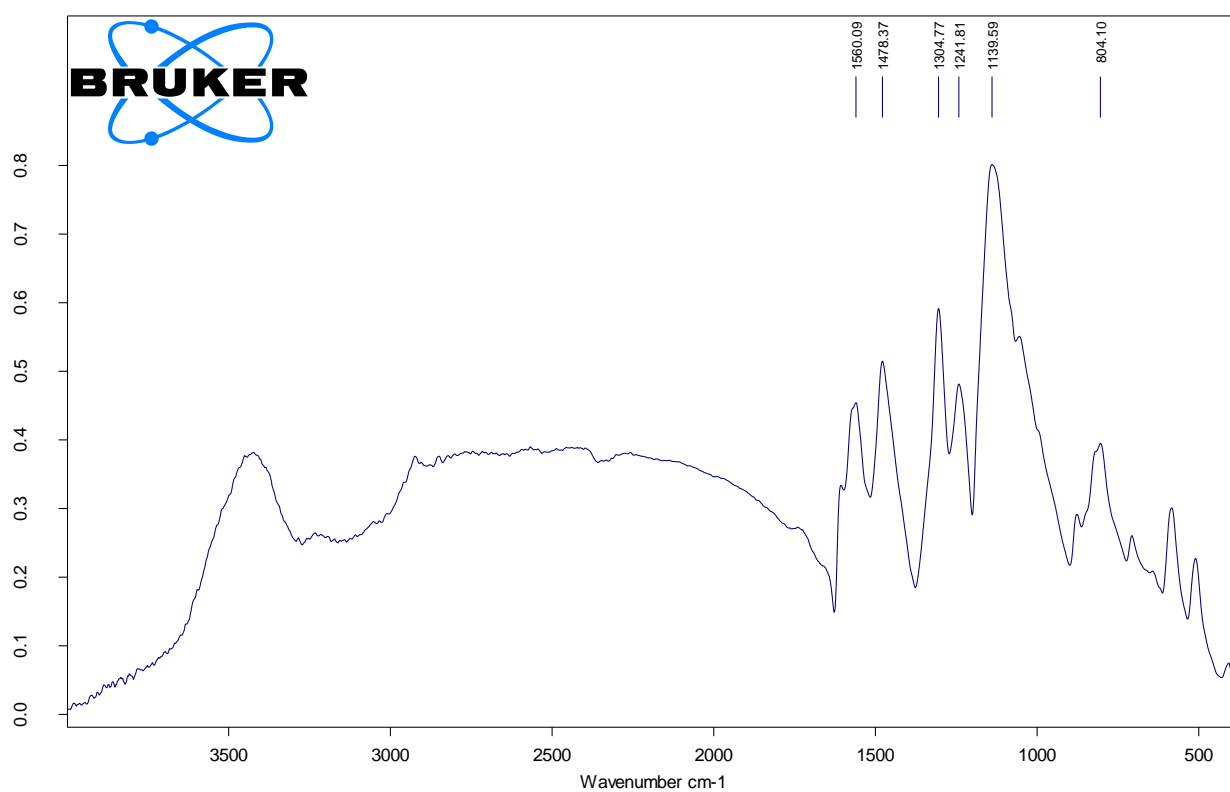

(e)

**Figure S1.** FTIR spectrum of different core/shell pigments and PANi (a) bentonite-based core/shell pigment; (b) kaolin-based core/shell pigment; (c) muscovite-based core/shell pigment; (d) talc-based core/shell pigment; (e) PANi doped with sulfuric acid.
